# Supplementary material
Source: PubMed Central journal article supplement (PMC4097806)
Supplement: JVI.00428-14_zjv999099248so1.pdf [file JVI.00428-14_zjv999099248so1.pdf]

1 **Supplemental movie legends**

2 **Supplemental movie S1.** Visualization of HIVunc<sup>eGFP</sup> assembly in a HeLa  
3 cell transfected with an equimolar mixture of pCHIVunc<sup>eGFP</sup> and pCHIVunc.  
4 The image series was recorded at 0.5 frames/s for 2h in TIR-FM mode.

5

6 **Supplemental Movie S2.** Assembly of HIVunc(LZ)<sup>eGFP</sup> at the plasma  
7 membrane of a particle producing cell. HeLa cells were transfected with an  
8 equimolar mixture of pCHIVunc(LZ) and pCHIVunc(LZ)<sup>eGFP</sup> and analyzed as  
9 described for supplementary movie S1. Frames from this movie at the  
10 indicated time points are shown in Fig. 3B. The image series was recorded at  
11 0.5 frames/s for 2h in TIR-FM mode.

12
